# Supplementary material
Source: PubMed Central journal article supplement (PMC5723986)
Supplement: 10.1074_M117.801936_jbc.M117.801936-1.pdf [file 10.1074_M117.801936_jbc.M117.801936-1.pdf]

## Supplementary Information for

### An N-terminal di-proline motif is essential for fatty acid-dependent degradation of $\Delta 9$ -desaturase in *Drosophila*

Akira Murakami<sup>1</sup>, Kohjiro Nagao<sup>1#</sup>, Naoto Juni<sup>1</sup>, Yuji Hara<sup>1,2</sup>, and Masato Umeda<sup>1#</sup>

<sup>1</sup> *Department of Synthetic Chemistry and Biological Chemistry, Graduate School of Engineering, Kyoto University, Kyoto 615-8510, Japan*

<sup>2</sup> *AMED-PRIME, Japan Agency for Medical Research and Development, Tokyo 100-0004, Japan.*

**Running title: Role of di-proline motif in  $\Delta 9$ -desaturase degradation**

<sup>#</sup>To whom correspondence should be address : A4-212 Katsura, Nishikyo-ku, Kyoto 615-8510, Japan, Tel.: 81-75-383-2766; Fax.: 81-383-2767; E-mail: [umeda@sbchem.kyoto-u.ac.jp](mailto:umeda@sbchem.kyoto-u.ac.jp), [nagao@sbchem.kyoto-u.ac.jp](mailto:nagao@sbchem.kyoto-u.ac.jp)

#### Contents

SUPPLEMENTAL TABLE I. Primer pairs used for plasmid construction by site-directed mutagenesis.

SUPPLEMENTAL TABLE II. Primer pairs used for plasmid construction using an In-Fusion HD Cloning Kit.

SUPPLEMENTAL TABLE III. Primer pairs used for preparation of dsRNA.

SUPPLEMENTAL FIGURE 1. Effect of unsaturated fatty acids on DESAT1 expression.

SUPPLEMENTAL FIGURE 2. Effect of unsaturated fatty acids on the fatty acid composition of cellular phospholipids.

SUPPLEMENTAL FIGURE 3. Effect of SCD1 inhibitors on  $\Delta 9$ -desaturase activity of DESAT1.

SUPPLEMENTAL FIGURE 4. Effect of DESAT1 inhibitors on DESAT1 expression.

SUPPLEMENTAL FIGURE 5. Role of N-terminal domain of DESAT1 in the regulation of degradation of DESAT1.

SUPPLEMENTAL FIGURE 6. Role of N-terminal residues of DESAT1 in the regulation of degradation of DESAT1.

SUPPLEMENTAL FIGURE 7. Role of di-proline motif in the degradation of  $\Delta 9$ -desaturase.

SUPPLEMENTAL FIGURE 8. Identification of protease involved in the degradation of DESAT1.

SUPPLEMENTAL FIGURE 9. Effect of MG132 on the removal of ubiquitinated proteins.

SUPPLEMENTAL FIGURE 10. Effect of MG132 on the degradation of internally FLAG-tagged DESAT1.

SUPPLEMENTAL FIGURE 11. Effect of calcium ionophore on the degradation of DESAT1 protein.

SUPPLEMENTAL FIGURE 12. Role of residues 7-59 on the regulation of degradation of DESAT1.

**SUPPLEMENTAL TABLE I. Primer pairs used for plasmid construction by site-directed mutagenesis.**

|                   | Sequence (5' to 3')                   | Plasmid                                                                                                                                                                                                               |
|-------------------|---------------------------------------|-----------------------------------------------------------------------------------------------------------------------------------------------------------------------------------------------------------------------|
| $\Delta$ 2-60-Fwd | TGAATGAATTCAACATGAAGAAGGCGAG          | $\Delta$ 2-60 DESAT1-FLAG <sup>C</sup>                                                                                                                                                                                |
| $\Delta$ 2-41-Fwd | TAGAATTCAACATGTTTCGAGTGCGATGTG        | $\Delta$ 2-41 DESAT1-FLAG <sup>C</sup>                                                                                                                                                                                |
| $\Delta$ 2-21-Fwd | AGAATTCAACATGGCCGCCGCGAC              | $\Delta$ 2-21 DESAT1-FLAG <sup>C</sup>                                                                                                                                                                                |
| $\Delta$ 2-11-Fwd | CCGGAATTCAACATGATCTCAGACTCGCT         | $\Delta$ 2-11 DESAT1-FLAG <sup>C</sup>                                                                                                                                                                                |
| $\Delta$ 2-6-Fwd  | ATAGAATTCAACATGGCCGGTGCCCAAGTC        | $\Delta$ 2-6 DESAT1-FLAG <sup>C</sup>                                                                                                                                                                                 |
| C-term-Rev1       | GGCGCTCTAGACTACTTGTCTCGTCATC          | $\Delta$ 2-60 DESAT1-FLAG <sup>C</sup> ,<br>$\Delta$ 2-41 DESAT1-FLAG <sup>C</sup> ,<br>$\Delta$ 2-21 DESAT1-FLAG <sup>C</sup> ,<br>$\Delta$ 2-11 DESAT1-FLAG <sup>C</sup> ,<br>$\Delta$ 2-6 DESAT1-FLAG <sup>C</sup> |
| N4A-Q6A-Fwd       | CCCGCTGCTGCAGCCGGTGCCCAAGTCCATC       | DESAT1 (N4A/Q6A)-FLAG <sup>C</sup>                                                                                                                                                                                    |
| N4A-Q6A-Rev       | GGCTGCAGCAGCGGGCGGCATGTTGAATTCC       | DESAT1 (N4A/Q6A)-FLAG <sup>C</sup>                                                                                                                                                                                    |
| P2A-P3A-Fwd       | TAGAATTCAACATGGCGGCCAACGCCCAAG        | DESAT1 (P2A/P3A)-FLAG <sup>C</sup>                                                                                                                                                                                    |
| P3A-Fwd           | TAGAATTCAACATGCCGCGGCCAACGCCCAAG      | DESAT1 (P3A)-FLAG <sup>C</sup>                                                                                                                                                                                        |
| P2A-Fwd           | TAGAATTCAACATGGCGGCCAACGCCCAAG        | DESAT1 (P2A)-FLAG <sup>C</sup>                                                                                                                                                                                        |
| C-term-Rev2       | GCGCCCCTCTAGACTACTTGTCTCGTCATCG<br>TC | DESAT1 (P2A/P3A)-FLAG <sup>C</sup> ,<br>DESAT1 (P3A)-FLAG <sup>C</sup> ,<br>DESAT1 (P2A)-FLAG <sup>C</sup>                                                                                                            |

**SUPPLEMENTAL TABLE II. Primer pairs used for plasmid construction using an In-Fusion HD Cloning Kit.**

|                   | Sequence (5' to 3')                         | Plasmid                                                       |
|-------------------|---------------------------------------------|---------------------------------------------------------------|
| Chimera-Fwd1      | GCGTCATTTTGGCTCGAAATAGGCAATTAT              | Chimera-FLAG <sup>C</sup> ,<br>Chimera (AA)-FLAG <sup>C</sup> |
| Chimera-Rev1      | GATGTTCCCTCCAGACGAGCTTCAGGCGGCG             | Chimera-FLAG <sup>C</sup> ,<br>Chimera (AA)-FLAG <sup>C</sup> |
| Chimera-Fwd2      | GTCTGGAGGAACATCATTCTCATGGTC                 | Chimera-FLAG <sup>C</sup> ,<br>Chimera (AA)-FLAG <sup>C</sup> |
| Chimera-Rev2      | GAGCCAAAATGACGCATAAAAGGAAACGGC              | Chimera-FLAG <sup>C</sup> ,<br>Chimera (AA)-FLAG <sup>C</sup> |
| Scd1-di-Pro-Fwd   | ATGCCGCCCCACATGCTCCAAGAG                    | SCD1 (di-Pro)-FLAG <sup>C</sup>                               |
| Scd1-di-Pro-Rev   | CATGTGGGGCGGCATGGCGATCGC                    | SCD1 (di-Pro)-FLAG <sup>C</sup>                               |
| Δ7-33-Fwd         | GCCCAACAGGAGGACTCCACCGGAGTG                 | Δ7-33 DESAT1-FLAG <sup>C</sup>                                |
| Δ7-33-Rev         | GTCCTCCTGTTGGGCGTTGGGCGGCAT                 | Δ7-33 DESAT1-FLAG <sup>C</sup>                                |
| Δ34-59-Fwd        | ACCAAGCTGCAGAAGGCCGAGAAG                    | Δ34-59 DESAT1-FLAG <sup>C</sup>                               |
| Δ34-59-Rev        | CTTCTGCAGCTTGGTGGGGCTCTG                    | Δ34-59 DESAT1-FLAG <sup>C</sup>                               |
| Δ7-59-Fwd         | GCCCAAAAGAAGGCCGAGAAGCGCCGC                 | Δ7-59 DESAT1-FLAG <sup>C</sup>                                |
| Δ7-59-Rev         | GGCCTTCTTTTGGGCGTTGGGCGGCAT                 | Δ7-59 DESAT1-FLAG <sup>C</sup>                                |
| Internal-FLAG-Fwd | AAAGACGATGACGACGACAAGGTCGATCTAT<br>CCGATCTG | DESAT1-FLAG <sup>Internal</sup>                               |
| Internal-FLAG-Rev | GTCGTCATCGTCTTTGTAGTCCCCCTTGCCT<br>TGGCTTT  | DESAT1-FLAG <sup>Internal</sup>                               |

**SUPPLEMENTAL TABLE III. Primer pairs used for preparation of dsRNA.**

---

|               | Sequence (5' to 3')                            |
|---------------|------------------------------------------------|
| Calpain-A-Fwd | TAATACGACTCACTATAGGGCAATTTGTCGCCGGACTC         |
| Calpain-A-Rev | TAATACGACTCACTATAGGGATAAAGTGCGGGCGATCTTC       |
| Calpain-B-Fwd | TAATACGACTCACTATAGGGCTCGTTGCCCTATCCATCAT       |
| Calpain-B-Rev | TAATACGACTCACTATAGGGAACATGTTCTGGTTCTCGGG       |
| Calpain-C-Fwd | TAATACGACTCACTATAGGGCAGCTGGTGTGCCTGAA          |
| Calpain-C-Rev | TAATACGACTCACTATAGGGTCTTGAAGAAGTCCTTCTGC       |
| SOL-Fwd       | TAATACGACTCACTATAGGGGCGAAGATCTGGTCAAGGAG       |
| SOL-Rev       | TAATACGACTCACTATAGGGACTGGCCTGTAGTGGAATGC       |
| GFP-Fwd       | ATTAATACGACTCACTATAGGGAGGAGGGCGAGGAGCTG TTCACC |
| GFP-Rev       | ATTAATACGACTCACTATAGGGAGGCTCGTCCATGCCGAGAGTG   |

---

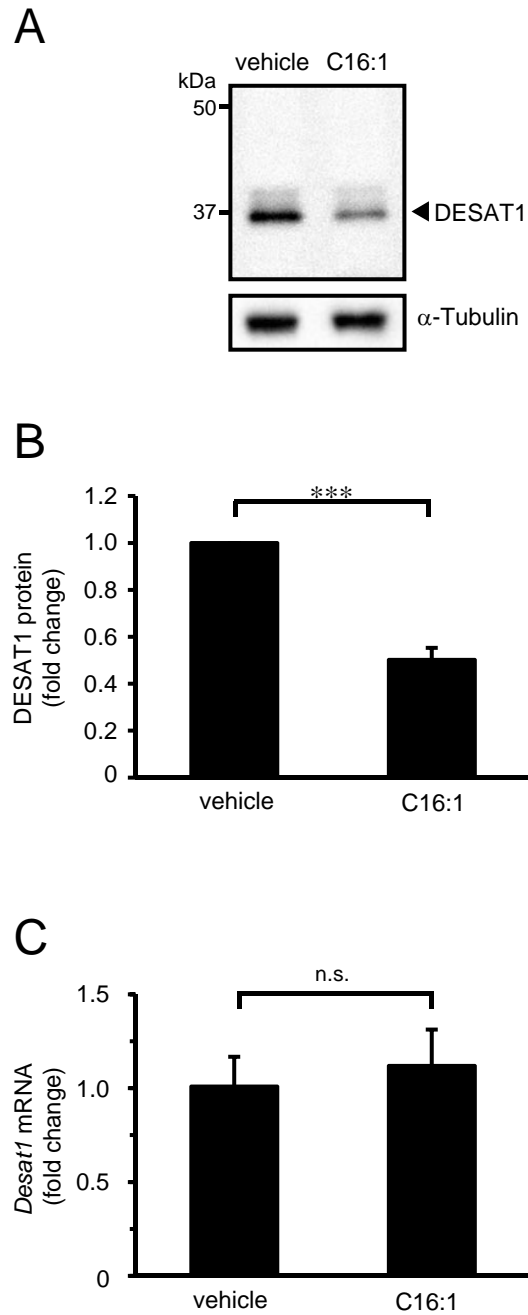

**SUPPLEMENTAL FIGURE 1. Effect of unsaturated fatty acids on DESAT1 expression.**

S2 cells were treated with the indicated fatty acid (100  $\mu$ M) for 6 h, and the amounts of DESAT1 and  $\alpha$ -Tubulin protein were detected with anti-DESAT1 antibody and anti- $\alpha$ -Tubulin antibody, respectively (A, B). Band intensities were determined by Image J software, and levels of DESAT1 proteins are shown relative to the amount of DESAT1 protein in vehicle-treated cells (B). S2 cells were treated with the indicated fatty acid (100  $\mu$ M) for 6 h, and the expression levels of *Desat1* mRNA were determined by real-time PCR (C). Mean  $\pm$  SD (n = 3). \*\*\* $P$  < 0.001; n.s., not significant.

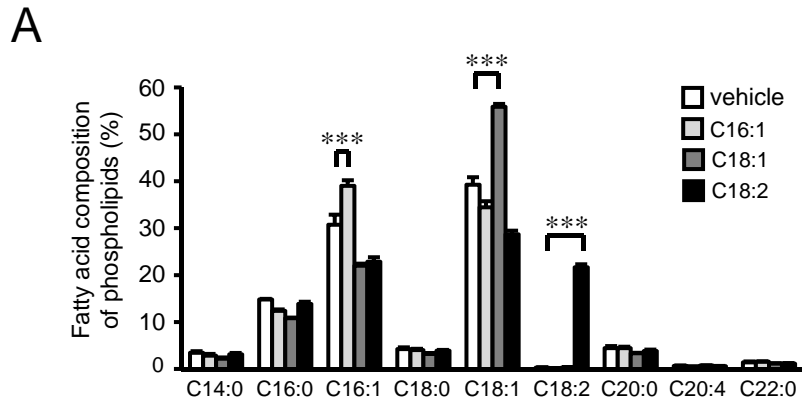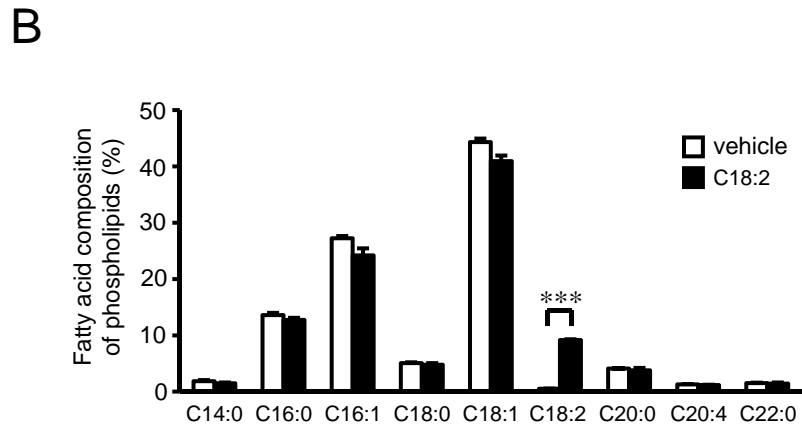

**SUPPLEMENTAL FIGURE 2. Effect of unsaturated fatty acids on the fatty acid composition of cellular phospholipids.** S2 cells were treated with the indicated fatty acid (100  $\mu$ M) for 6 h (A) or 1 h (B), and fatty acid compositions of phospholipids were analyzed by gas chromatography. Mean  $\pm$  SD (n = 3). \*\*\* $P$  < 0.001.

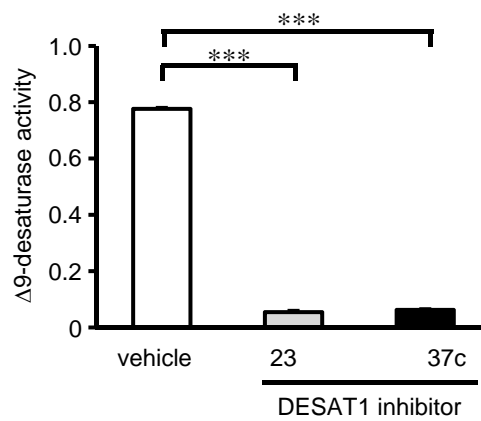

**SUPPLEMENTAL FIGURE 3. Effect of SCD1 inhibitors on Δ9-desaturase activity of DESAT1.** S2 cells were treated with SCD1 inhibitor 23 or 37c (1 μM) in the presence of C17:0 (20 μM) for 6 h. The conversion of C17:0 to C17:1 was determined by gas chromatography. Δ9-desaturase activity was defined as the ratio of the amount of C17:1 to the total amount of C17 fatty acid species. The proportions of incorporated 17-carbon length fatty acids (C17:0 and C17:1) in the acyl chains of phospholipids were  $4.4 \pm 0.2\%$ ,  $4.7 \pm 0.3\%$ , and  $3.8 \pm 0.0\%$  in vehicle-, SCD1 inhibitor 23-, and SCD1 inhibitor 37c-treated cells, respectively. Mean  $\pm$  SD (n = 3). \*\*\* $P < 0.001$ .

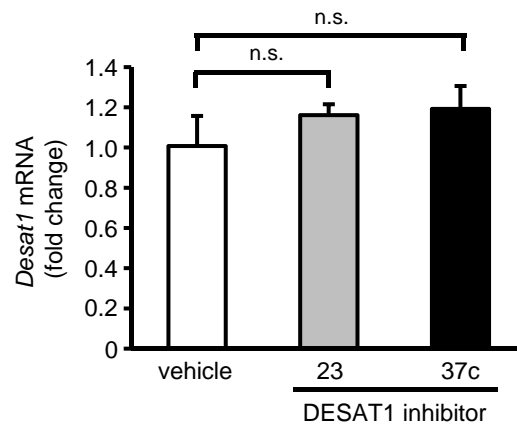

**SUPPLEMENTAL FIGURE 4. Effect of DESAT1 inhibitors on DESAT1 expression.** S2 cells were treated with DESAT1 inhibitor 23 or 37c (1  $\mu$ M) for 16 h, and the expression levels of *Desat1* mRNA were determined by real-time PCR. Mean  $\pm$  SD (n = 3). n.s., not significant.



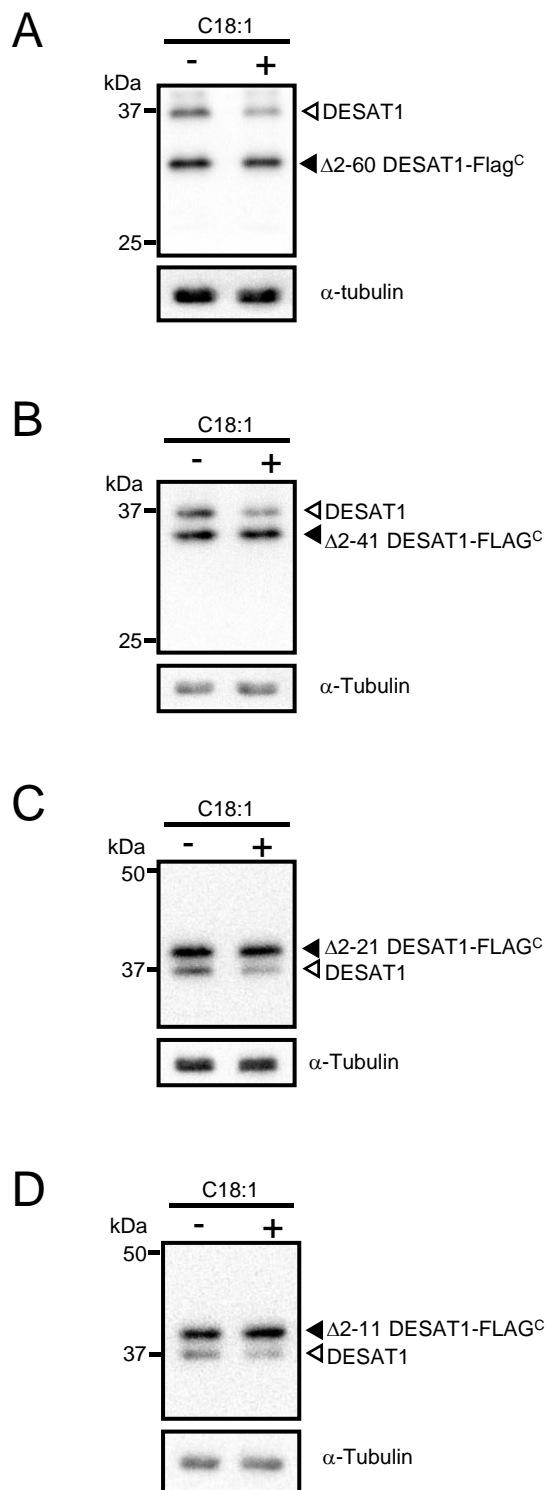

**SUPPLEMENTAL FIGURE 5. Role of N-terminal domain of DESAT1 in the regulation of degradation of DESAT1.** S2 cells expressing  $\Delta 2-60$  DESAT1-FLAG<sup>C</sup> (A),  $\Delta 2-41$  DESAT1-FLAG<sup>C</sup> (B),  $\Delta 2-21$  DESAT1-FLAG<sup>C</sup> (C), and  $\Delta 2-11$  DESAT1-FLAG<sup>C</sup> (D) were treated with C18:1 (100  $\mu$ M) for 6 h, and the amounts of DESAT1 and  $\alpha$ -Tubulin protein were detected with anti-DESAT1 antibody and anti- $\alpha$ -Tubulin antibody, respectively. Filled arrowhead, exogenously expressed DESAT1-FLAG<sup>C</sup>; open arrowhead, endogenous DESAT1.

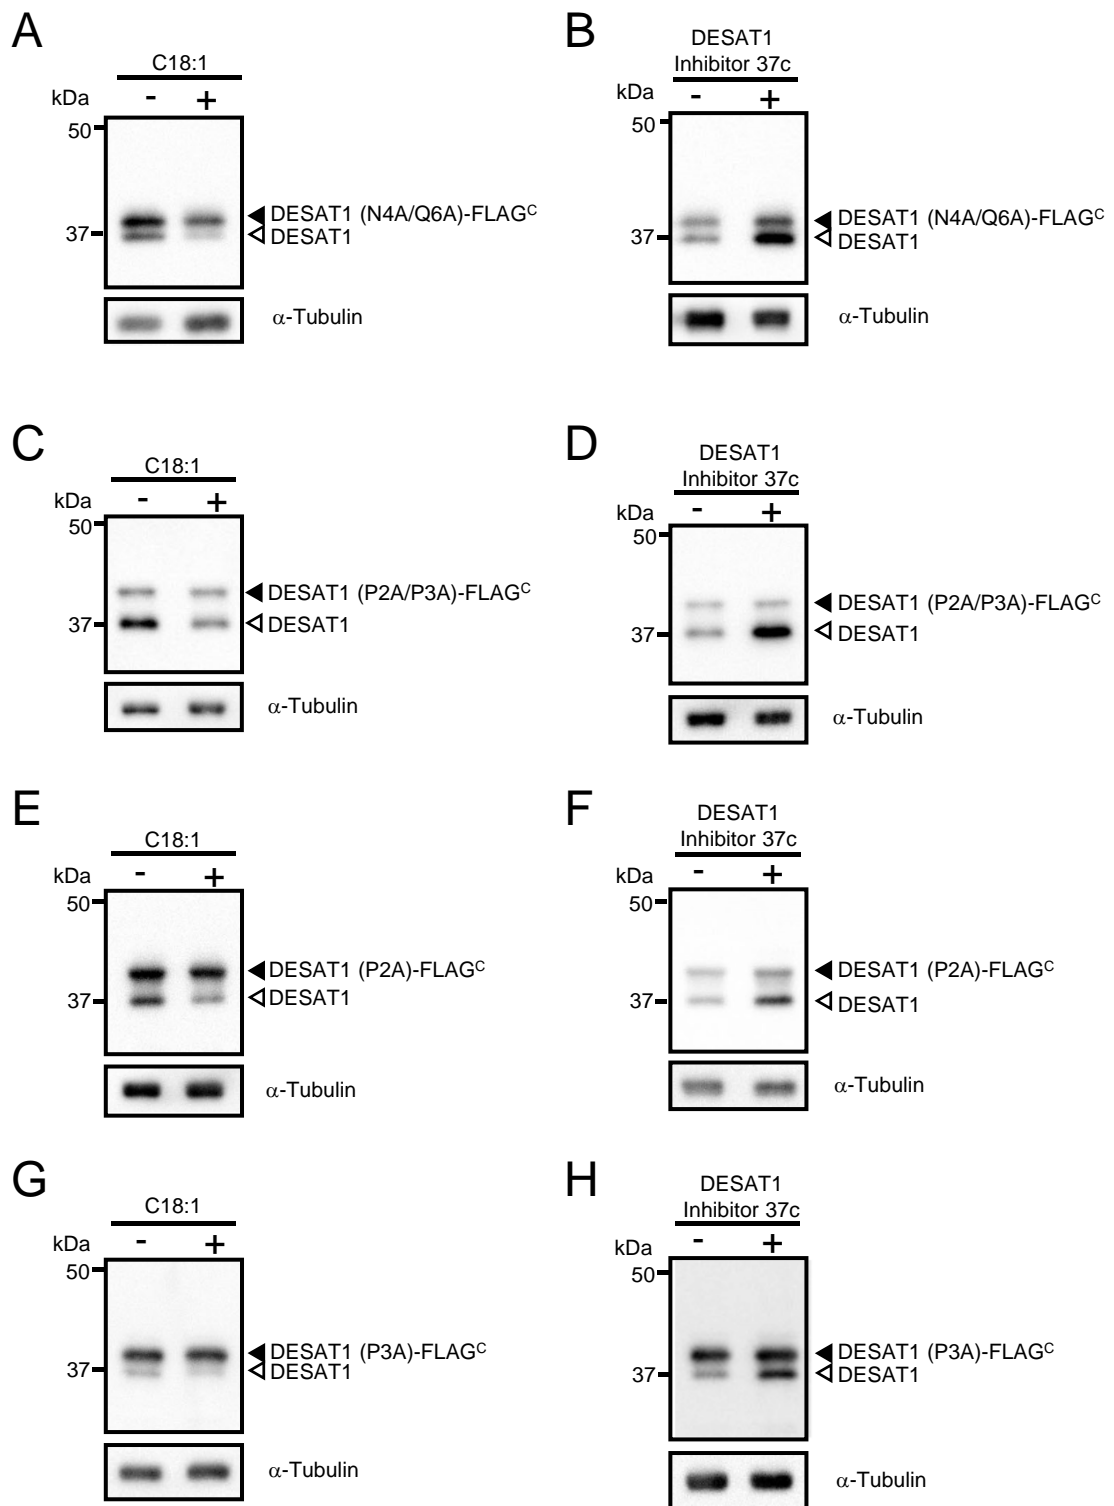

**SUPPLEMENTAL FIGURE 6. Role of N-terminal residues of DESAT1 in the regulation of degradation of DESAT1.** S2 cells expressing DESAT1 (N4A/Q6A)-FLAG<sup>C</sup> (A, B), DESAT1 (P2A/P3A)-FLAG<sup>C</sup> (C, D), DESAT1 (P2A)-FLAG<sup>C</sup> (E, F), and DESAT1 (P3A)-FLAG<sup>C</sup> (G, H) mutant were treated with C18:1 (100  $\mu$ M) for 6 h (A, C, E, G) or DESAT1 inhibitor 37c (1  $\mu$ M) for 16 h (B, D, F, H), and the amounts of DESAT1 and  $\alpha$ -Tubulin protein were detected with anti-DESAT1 antibody and anti- $\alpha$ -Tubulin antibody, respectively. Filled arrowhead, exogenously expressed DESAT1-FLAG<sup>C</sup>; open arrowhead, endogenous DESAT1.

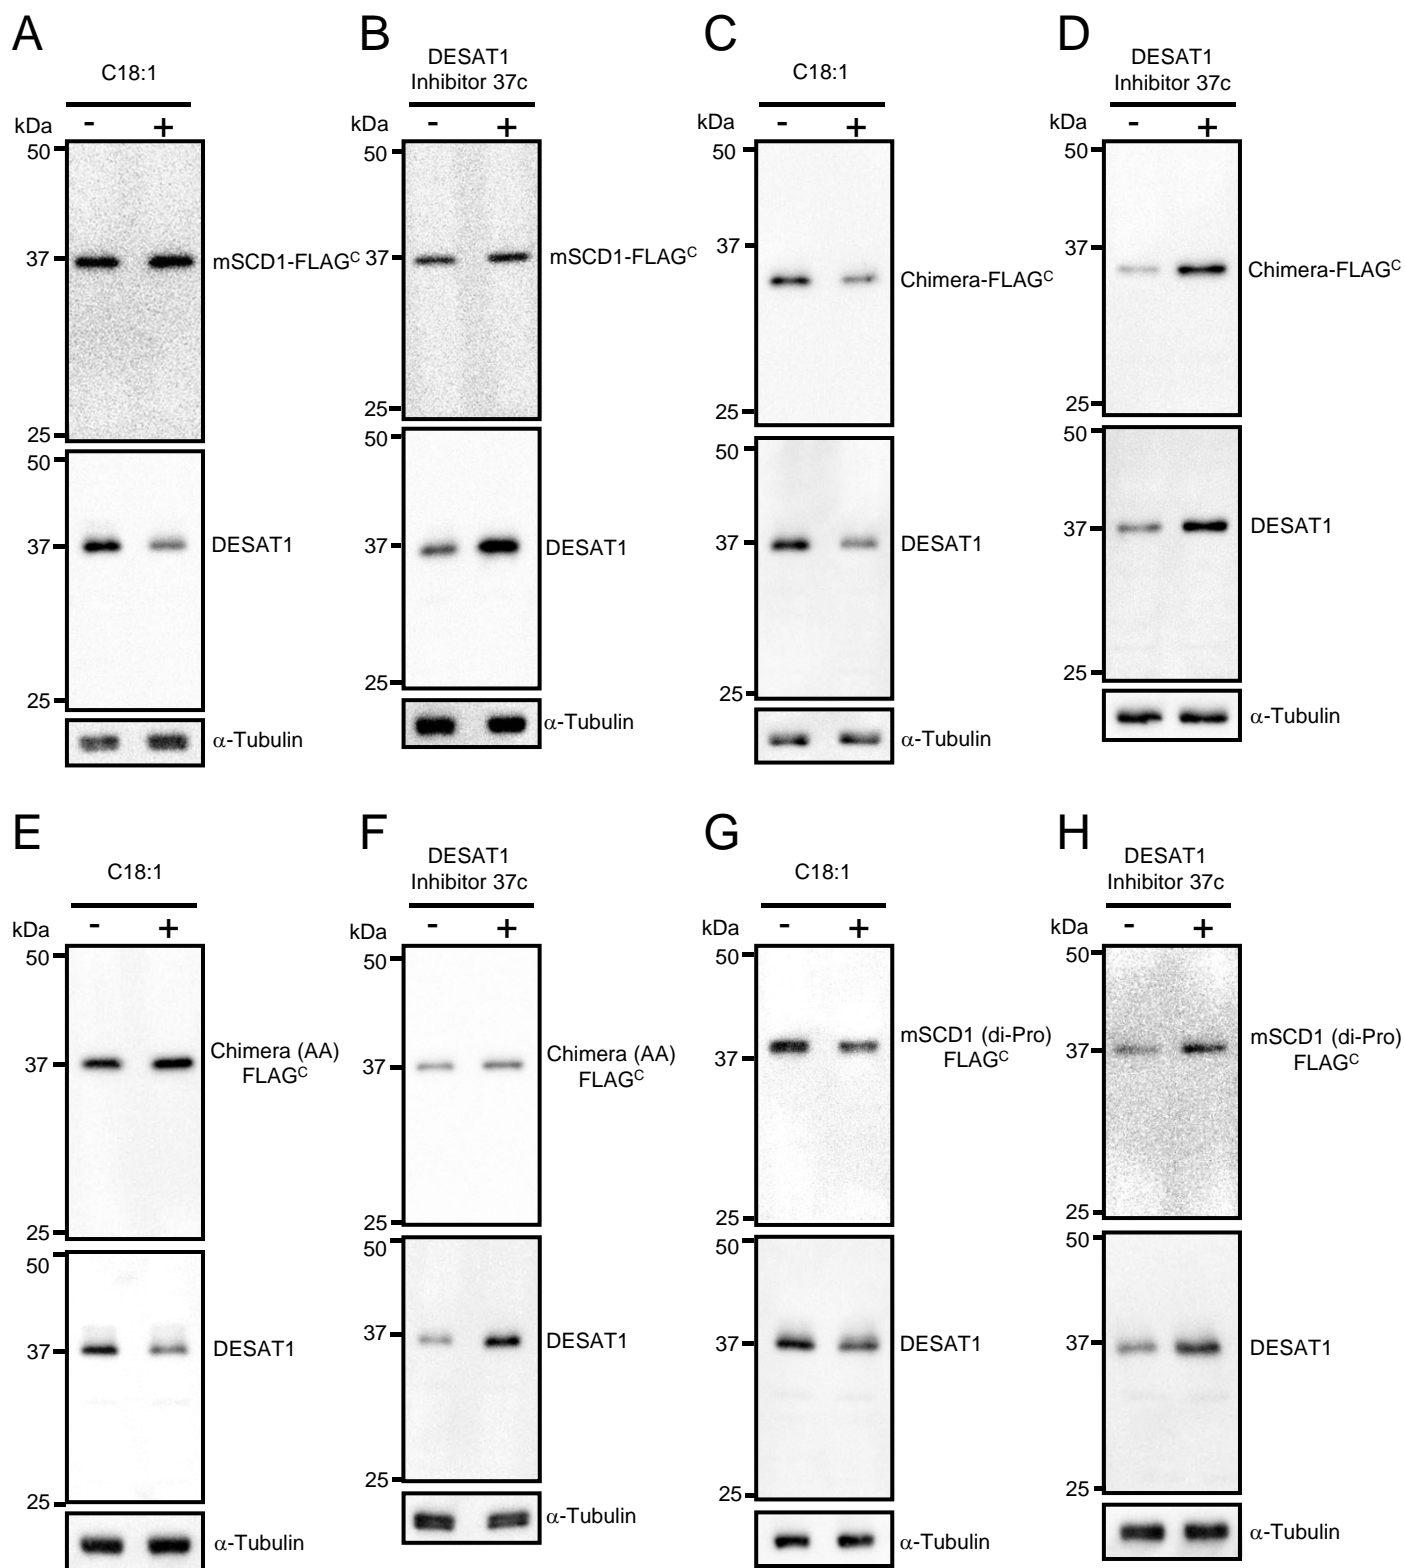

**SUPPLEMENTAL FIGURE 7. Role of di-proline motif in the degradation of  $\Delta 9$ -desaturase.** S2 cells expressing mouse SCD1-FLAG<sup>C</sup> (A, B), Chimera-FLAG<sup>C</sup> (C, D), Chimera (AA)-FLAG<sup>C</sup> (E, F), and SCD1 (di-Pro)-FLAG<sup>C</sup> (G, H) were treated with C18:1 (100  $\mu$ M) for 6 h (A, C, E, G) or DESAT1 inhibitor 37c (1  $\mu$ M) for 16 h (B, D, F, H), and the amounts of endogenous DESAT1, FLAG-tagged exogenously expressed SCD1, and  $\alpha$ -Tubulin protein were detected with anti-DESAT1 antibody, anti-FLAG antibody, and anti- $\alpha$ -Tubulin antibody, respectively.

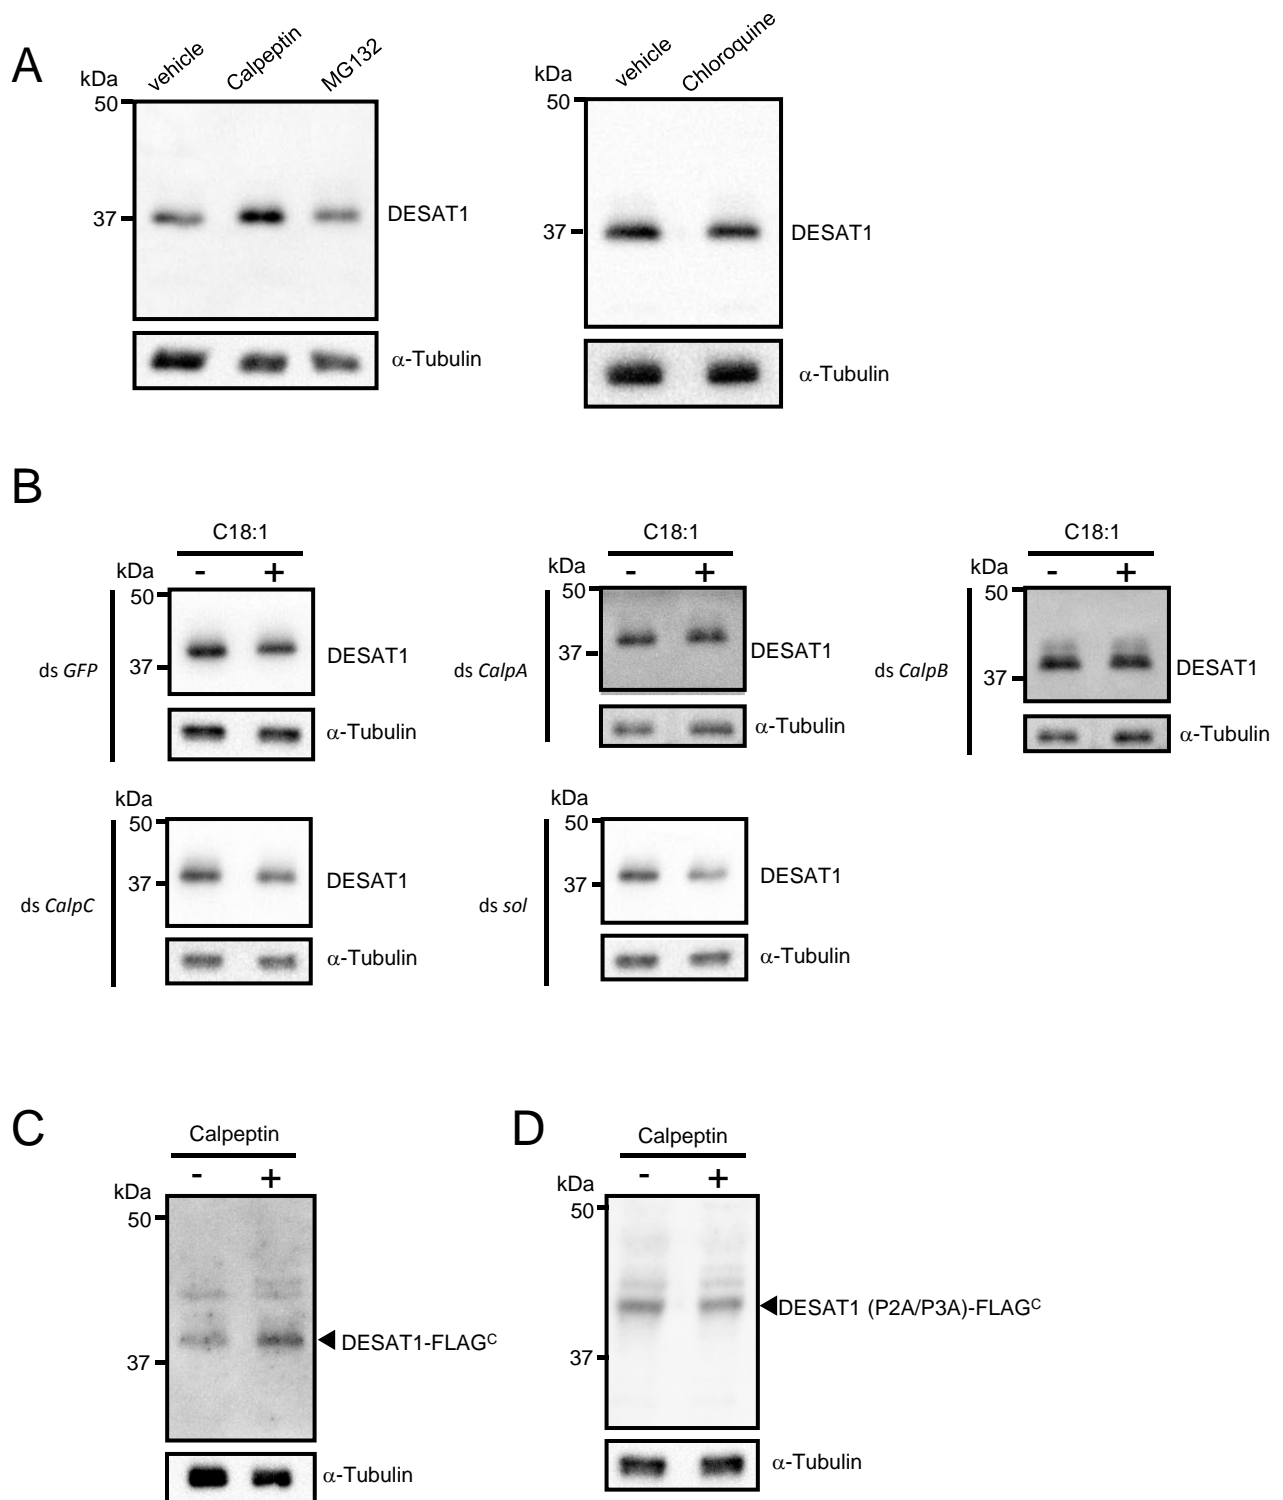

**SUPPLEMENTAL FIGURE 8. Identification of protease involved in the degradation of DESAT1.** S2 cells were treated with calpeptin (50  $\mu$ M), MG132 (50  $\mu$ g/ml), or chloroquine (50  $\mu$ M) for 6 h (A). S2 cells were treated with dsRNA against *GFP*, *CalpA*, *CalpB*, *CalpC*, or *sol* for 72 h and then exposed to C18:1 (100  $\mu$ M) for 6 h (B). S2 cells expressing DESAT1-FLAG<sup>C</sup> (C), and DESAT1 (P2A/P3A)-FLAG<sup>C</sup> (D) were treated with calpeptin (50  $\mu$ M) for 6 h. The amounts of endogenous DESAT1, FLAG-tagged exogenously expressed DESAT1, and  $\alpha$ -Tubulin protein were detected with anti-DESAT1 antibody, anti-FLAG antibody, and anti- $\alpha$ -Tubulin antibody, respectively (A-D).

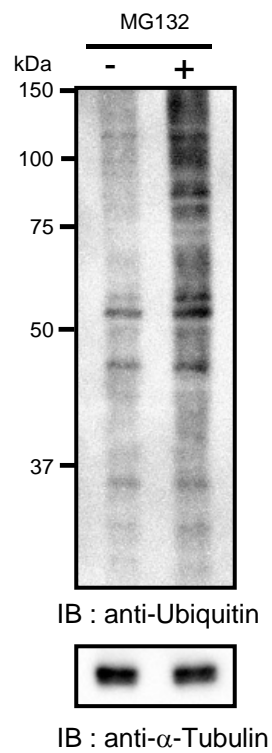

**SUPPLEMENTAL FIGURE 9. Effect of MG132 on the removal of ubiquitinated proteins.** S2 cells were treated with MG132 (50  $\mu$ g/ml) for 6 h. The amounts of ubiquitinated proteins and  $\alpha$ -Tubulin protein were detected with indicated antibodies.

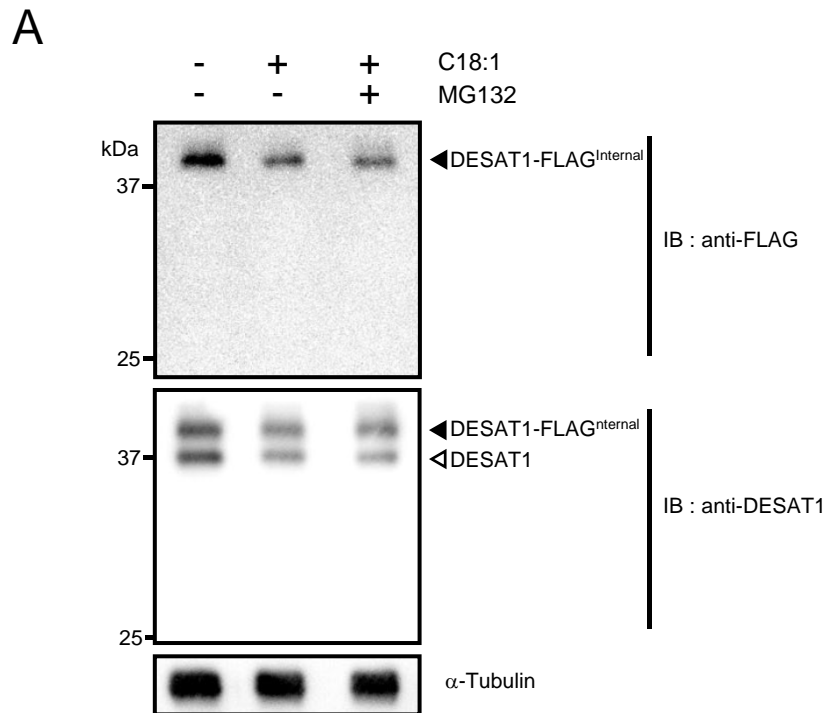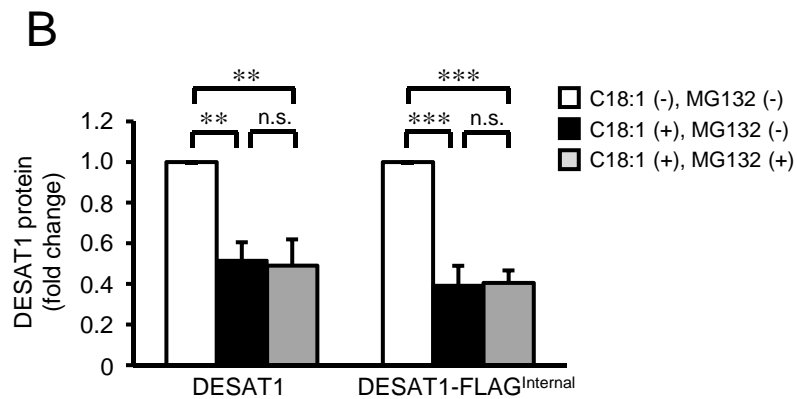

**SUPPLEMENTAL FIGURE 10. Effect of MG132 on the degradation of internally FLAG-tagged DESAT1.** S2 cells expressing DESAT1-FLAG<sup>Internal</sup> were treated with C18:1 (100  $\mu$ M) and MG132 (50  $\mu$ g/ml) for 6 h, and the amounts of endogenous DESAT1, FLAG-tagged exogenously expressed DESAT1, and  $\alpha$ -Tubulin protein were detected with anti-DESAT1 antibody, anti-FLAG antibody, and anti- $\alpha$ -Tubulin antibody, respectively (A, B). Band intensities were determined by Image J software, and levels of DESAT1 proteins are shown relative to the amount of DESAT1 protein in vehicle-treated cells (B). Mean  $\pm$  SD (n = 3). \*\* $P$  < 0.01; \*\*\* $P$  < 0.001; n.s., not significant.

A

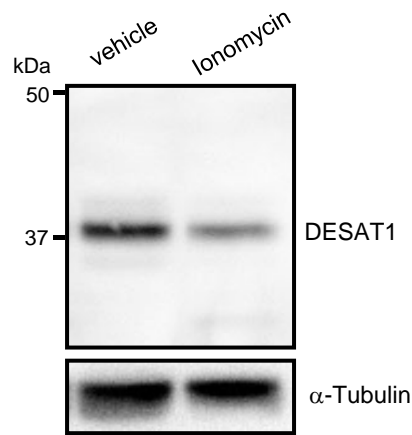

B

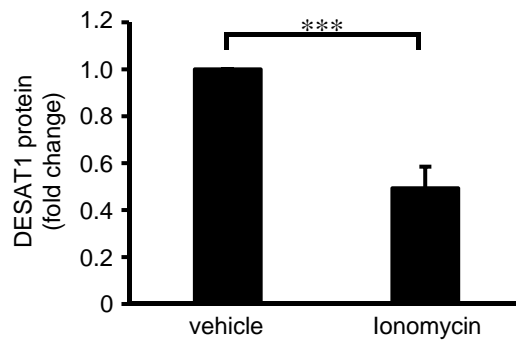

**SUPPLEMENTAL FIGURE 11. Effect of calcium ionophore on the degradation of DESAT1 protein.** S2 cells were treated with ionomycin (5  $\mu$ M) for 1 h, and the amounts of DESAT1 and  $\alpha$ -Tubulin protein were detected with anti-DESAT1 antibody and anti- $\alpha$ -Tubulin antibody, respectively (A, B). Band intensities were determined by Image J software, and levels of DESAT1 proteins are shown relative to the amount of DESAT1 protein in vehicle-treated cells (B). Mean  $\pm$  SD (n = 3). \*\*\* $P$  < 0.001.

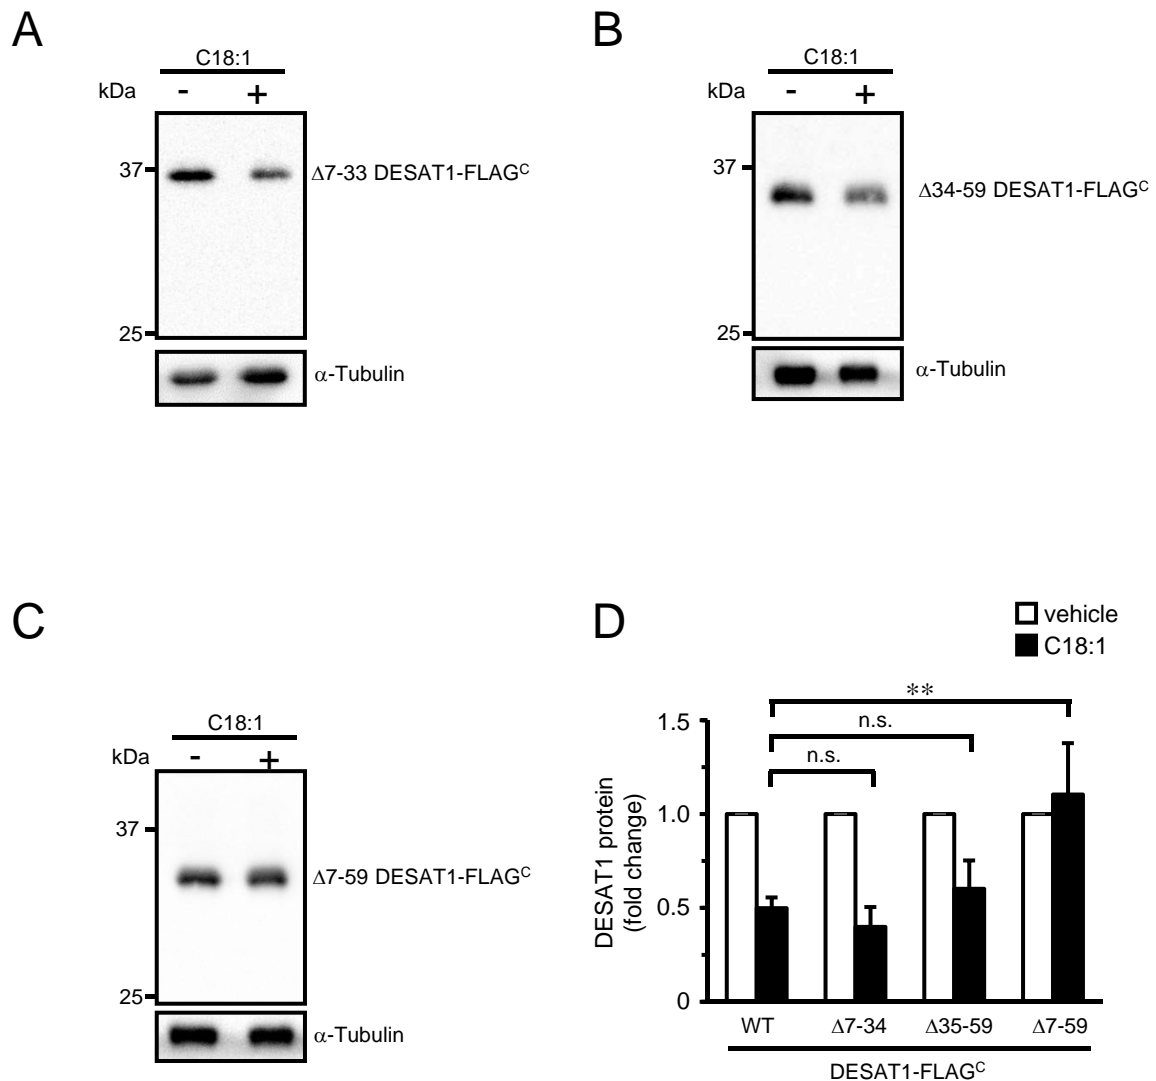

**SUPPLEMENTAL FIGURE 12. Role of residues 7-59 on the regulation of degradation of DESAT1.** S2 cells expressing  $\Delta 7-33$  DESAT1-FLAG<sup>C</sup> (A, D),  $\Delta 34-59$  DESAT1-FLAG<sup>C</sup> (B, D), and  $\Delta 7-59$  DESAT1-FLAG<sup>C</sup> (C, D) were treated with C18:1 (100  $\mu$ M) for 6 h, and the amounts of FLAG-tagged DESAT1 and  $\alpha$ -Tubulin protein were detected with anti-FLAG antibody and anti- $\alpha$ -Tubulin antibody, respectively. Band intensities were determined by Image J software, and levels of DESAT1 proteins are shown relative to the amount of DESAT1 protein in vehicle-treated cells (D). The values for DESAT1-FLAG<sup>C</sup> (Figure 3D) were shown for comparison (D). Mean  $\pm$  SD (n = 3). \*\* $P < 0.01$ ; n.s., not significant.
